# Supplementary material
Source: PubMed Central journal article supplement (PMC7274118)
Supplement: mmc1.pdf [file mmc1.pdf]

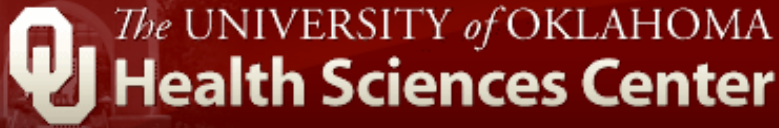

You are being asked to participate in a research study. Research studies are voluntary and include only people who choose to take part. You may choose not to participate. Refusal to participate will involve no penalty or loss of benefits to which you are otherwise entitled.

You are being asked to participate because you are a neurosurgery resident physician. We are collecting this information in order to find out whether and to what extent CoViD-19 has had an impact on training.

We ask that you complete the one-time survey. It should take around 3 minutes of your time. Because this survey is anonymous, we do not anticipate any risks to you or direct benefits associated with your participation. You may skip any questions that you do not want to answer, and you can change your mind about participating up to the point of clicking the submit button at the end of the survey.

If you have any questions about this study, you may contact the Principle Investigator, Andrew Bauer, MD at [Andrew-Bauer@ouhsc.edu](mailto:Andrew-Bauer@ouhsc.edu). If you cannot reach the Investigator or wish to speak to someone other than the investigator and for questions about your rights as a research participant, contact the OUHSC Director, Office of Human Research Participant Protection, at [irb@ouhsc.edu](mailto:irb@ouhsc.edu).

## Default Question Block

What is your year in residency?

What state or country is your program located in?

Has resident access to the hospital or work responsibilities been limited by your program or the hospital since the COVID pandemic started?

Yes

No

Has your hospital placed restrictions on elective surgery secondary to the COVID pandemic?

Yes

No

Has the volume of operative cases per week your department is doing decreased during the COVID pandemic?

Yes

No, the volume has remained the same

No, the volume has increased

How has the volume of patients you are seeing each week in outpatient clinic, inpatient consultation, and the ER changed during the COVID pandemic?

Greatly increased

Moderately increased

Slightly increased

Stayed about the same

Slightly decreased

Moderately decreased

Greatly decreased

How many hours per week, on average, did you work in your residency program prior to the COVID epidemic?

70 or more

60-69

50-59

40-49

Less than 40

How many hours per week, on average, do you work now in

## your residency program during to the COVID epidemic?

70 or more

60-69

50-59

40-49

Less than 40

How many hours per week did your program spend on didactic learning prior to the COVID pandemic?

>10

7-9

5-6

3-4

1-2

None

How many hours per week does your program spend on didactic learning since the COVID pandemic has started?

>10

7-9

5-6

3-4

1-2

None

Since the COVID pandemic I have spent increased time \_\_\_\_\_  
(pick all that apply).

Conducting non-neurosurgical medical care (ER triage, ICU shifts, etc.)

In remote didactic lectures with my program or national organizations  
(e.g., AANS, CNS, etc.)

Reading / board preparation

In the cadaver / anatomy lab

In the basic science research lab

Working on clinical research studies, case reports, etc.

None of the above

Have you noticed more or less faculty engagement with  
resident education since the COVID pandemic?

More engagement

Less engagement

The teaching engagement of our faculty has not changed

Have the faculty in your program checked in regularly with you to ensure that your educational needs are being met during the COVID pandemic?

Yes

No

Unchanged

Has your program converted weekly conferences and didactic lectures to remote platforms such as Zoom, GoToMeeting, Skype, etc.?

Yes

No

Has your program adopted the various online education platforms for residents (e.g. CNS Online Grand Rounds, CNS Virtual Visiting Professor, AANS Webinars, etc.) during the COVID pandemic?

Yes, in a monitored fashion

Yes, in an unmonitored fashion

No

We were previously using online/remote education platforms and that has not changed

How quickly did your program convert to using remote platforms to continue educational and departmental conferences?

Prior to quarantine restrictions being announced

Right away, there was no disruption in our schedule

Within 1 week of quarantine restrictions being announced

1-2 weeks after quarantine restrictions were announced

2-3 weeks after quarantine restrictions were announced

We were regularly using remote education platforms prior to this quarantine period

My program has not converted to remote platforms

We are continuing our in-person conference schedule

How has the amount of organized didactic lectures your program provides to residents changed during this pandemic period compared to before the pandemic?

- Much more
- Moderately more
- Slightly more
- About the same
- Slightly less
- Moderately less
- Much less

What is your general disposition to using remote platforms for didactic and departmental conferences?

- Generally favorable
- Indifferent
- Generally negative
- We are not using remote learning platforms

Does your program plan to continue using remote/online education tools after the quarantine period has ended?

- Yes



No

Unsure

Has your program been negatively affected because you or one of the other residents were exposed to or contracted COVID resulting in quarantine?

Yes

No

Has your program actively engaged you in formulating response plans, contingencies, etc. with regards to the pandemic?

Yes

No

Have you been asked by your hospital to provide non-neurosurgical medical services to assist with COVID patients (i.e. critical care, medical care, ventilator

management, ER coverage)?

Yes

No

How comfortable do you feel providing non-neurosurgical medical care (i.e. ICU ventilator management, ER triage, etc.) if it were required of you?

Extremely comfortable

Moderately comfortable

Slightly comfortable

Neither comfortable nor uncomfortable

Slightly uncomfortable

Moderately uncomfortable

Extremely uncomfortable

Has the hospital or your department offered training / didactics in the non-neurosurgical medical care of COVID-19 patients?

Yes

No

Unsure

Do you feel that working as a physician during the COVID pandemic has negatively impacted your interpersonal relationships with family and friends?

Yes

No

Do you feel you have unfairly been required to continue or adapt your clinical duties in the face of the pandemic?

Yes

No

Have you been required to reschedule vacation or elective time due to the pandemic?

Yes

No

I feel that the COVID pandemic will negatively impact the cumulative experience of my residency training.

True

False

Unsure

I am concerned that I will not meet the required ACGME case numbers by the end of my training due to the restrictions during the COVID pandemic?

True

False

Do you feel that the COVID pandemic will ultimately affect your chances of getting the fellowship / job of your choice?

Yes

No

Maybe

Is your overall perception of a career in medicine impacted by the COVID pandemic?

I have a more favorable perception of my career than before

I have a less favorable perception of my career than before

My perception of medicine has not changed

Powered by Qualtrics
